# Supplementary material for: CD71+ erythroid cells suppress T-cell effector functions and predict immunotherapy outcomes in patients with virus-associated solid tumors
Source: PubMed Central journal article supplement — J Immunother Cancer. 2023 May 26;11(5):e006595. doi: 10.1136/jitc-2022-006595 (PMC10230995; doi:10.1136/jitc-2022-006595), 2023-05-26
Supplement: jitc-2022-006595supp003.pdf [file jitc-2022-006595supp003.pdf]

**Supplementary Table 1. Patients' Characteristics**

| Subject NO# | Viral Marker | Tumor Site  | Sex | Stage | Best Response | Response Category | Hemoglobin(g/L) |     |     |
|-------------|--------------|-------------|-----|-------|---------------|-------------------|-----------------|-----|-----|
|             |              |             |     |       |               |                   | C0              | C1  | C5  |
| CCI-1       | p16          | Penis       | M   | IV    | iUPD          | NR                | 137             | 130 | N/A |
| CCI-2       | p16          | Larynx      | M   | IVC   | iCCR          | R                 | 98              | 104 | 127 |
| CCI-3       | EBER         | Nasopharynx | M   | II    | iCCR          | R                 | 97              | 90  | 72  |
| CCI-4       | p16          | Penis       | M   | IV    | iCPR          | R                 | 159             | 159 | 161 |
| CCI-5       | EBER         | Nasopharynx | M   | III   | iCPD          | NR                | 158             | 149 | 144 |
| CCI-7       | p16          | Anal        | M   | III   | NE            | NE                | 150             | 139 | N/A |
| CCI-8       | EBER         | Nasopharynx | M   | IVA   | iUPD          | NR                | 149             | 141 | 148 |
| CCI-9       | EBER         | Nasopharynx | F   | IVB   | iCPD          | NR                | 118             | 140 | 123 |
| CCI-10      | p16          | Tonsil      | M   | IVC   | iUPD          | NR                | 113             | 131 | 114 |
| CCI-11      | p16          | Vulva       | F   | IVA   | NE            | NE                | 127             | 124 | N/A |
| CCI-12      | EBER         | Nasopharynx | M   | II    | iUPD          | NR                | 127             | 123 | 91  |
| CCI-13      | p16          | Oropharynx  | M   | IV    | NE            | NE                | 90              | 91  | N/A |
| CCI-14      | p16          | Cervix      | F   | II    | iUPD          | NR                | 110             | 105 | N/A |
| CCI-15      | p16          | Penis       | M   | II    | iUPR          | R                 | 131             | 133 | N/A |
| CCI-17      | p16          | Cervix      | F   | III   | iCPD          | NR                | 135             | 123 | 143 |
| CCI-19      | p16          | Unknown     | F   | IV    | iCPR          | R                 | 129             | 138 | 142 |
| CCI-20      | p16          | Vulva       | F   | III   | iUPD          | NR                | 116             | 108 | 102 |
| CCI-21      | EBER         | Nasopharynx | M   | IVA   | NE            | NE                | 118             | 128 | 129 |
| CCI-22      | p16          | Cervix      | F   | II    | iSD           | R                 | 109             | 86  | N/A |
| CCI-23      | EBER         | Nasopharynx | M   | IVA   | NE            | Progression       | 108             | 111 | N/A |
| CCI-24      | EBER         | Tonsil      | M   | III   | iUPD          | NR                | 128             | 125 | 127 |
| CCI-25      | EBER         | Nasopharynx | M   | IVA   | iSD           | R                 | 162             | 163 | 159 |
| CCI-26      | p16          | Cervix      | F   | IVB   | NE            | NE                | 126             | 151 | N/A |
| CCI-27      | p16          | Cervix      | F   | IVA   | iSD           | R                 | 101             | 104 | 94  |
| CCI-28      | p16          | Nasopharynx | M   | III   | iUPR          | R                 | 135             | 138 | 133 |
| CCI-29      | p16          | Oropharynx  | M   | IVB   | iCPD          | NR                | 128             | 132 | 111 |
| CCI-30      | p16          | Tonsil      | M   | III   | NE            | Progression       | 132             | 131 | N/A |
| CCI-31      | p16          | Tonsil      | M   | II    | iSD           | R                 | 135             | 139 | 132 |
| CCI-32      | EBER         | Nasopharynx | M   | IVB   | iCPD          | NR                | 131             | 138 | 133 |
| CCI-33      | p16          | Anal        | F   | IV    | iCCR          | R                 | 99              | 91  | 99  |
| CCI-34      | EBER         | Nasopharynx | M   | IVA   | iCPD          | NR                | 145             | 144 | 137 |
| CCI-35      | EBER         | Nasopharynx | F   | IVB   | iSD           | R                 | 134             | 127 | 130 |
| CCI-37      | p16          | Cervix      | F   | IVB   | iCPD          | NR                | 116             | 118 | 112 |
| CCI-38      | p16          | Anal        | F   | IV    | iUPD          | NR                | 99              | 101 | N/A |
| CCI-39      | p16          | Cervix      | F   | IVB   | iUPR          | R                 | 106             | 105 | 107 |
| CCI-40      | p16          | Anal        | M   | IV    | iUPD          | NR                | 146             | 137 | 124 |
| CCI-41      | p16          | Anal        | F   | IV    | iUPD          | NR                | 93              | 84  | N/A |
| CCI-42      | EBER         | Nasopharynx | M   | IVA   | iUPD          | NR                | 111             | 106 | 110 |
| CCI-43      | p16          | Anal        | F   | IV    | iUPD          | NR                | 102             | 117 | 112 |

M: Male, F: Female, iUPD: Unconfirmed progressive disease, iCCR: Confirmed complete response, iCPD: Confirmed progressive disease, NE: Response was not evaluated, iUPR:

**Supplementary Table 1. Patients' Characteristics**

Unconfirmed partial response, iCPR: Confirmed partial response, iSD: Stable disease, NR: Non-responder, R: Responder, C0: Baseline, C1: Cycle 1, C5: Cycle 5, N/A: Not available. Epstein-Barr virus-encoded small RNAs (EBER). HPB related protein (p16).
