# Supplementary figures and images for: CD71+ erythroid cells suppress T-cell effector functions and predict immunotherapy outcomes in patients with virus-associated solid tumors
Source: PubMed Central journal article supplement — J Immunother Cancer. 2023 May 26;11(5):e006595. doi: 10.1136/jitc-2022-006595 (PMC10230995; doi:10.1136/jitc-2022-006595), 2023-05-26

## Supplemental Figure 1

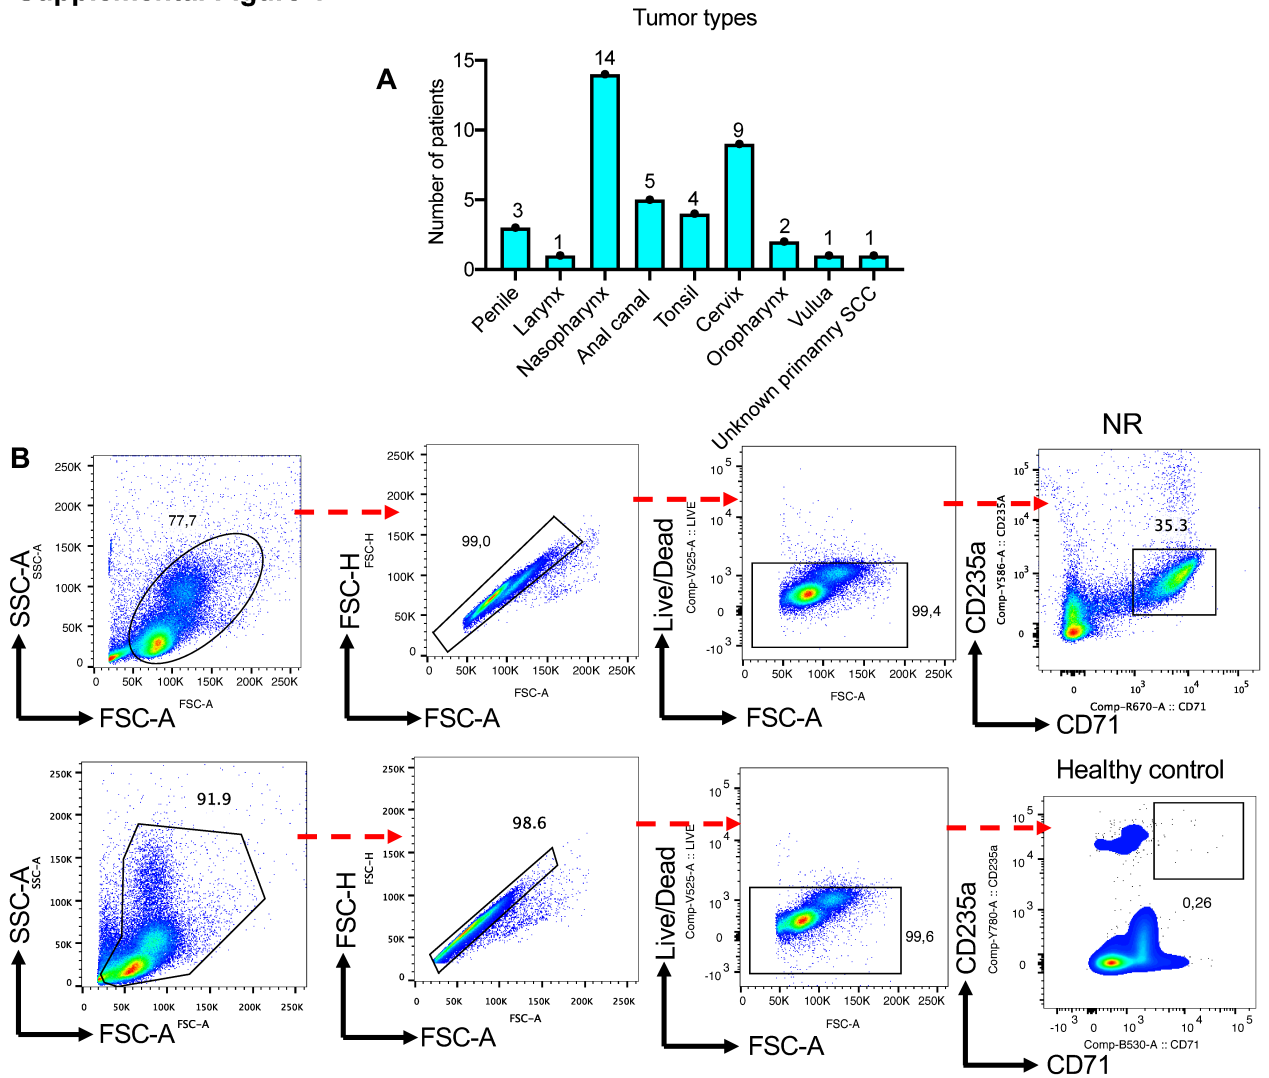

## Supplemental Figure 2

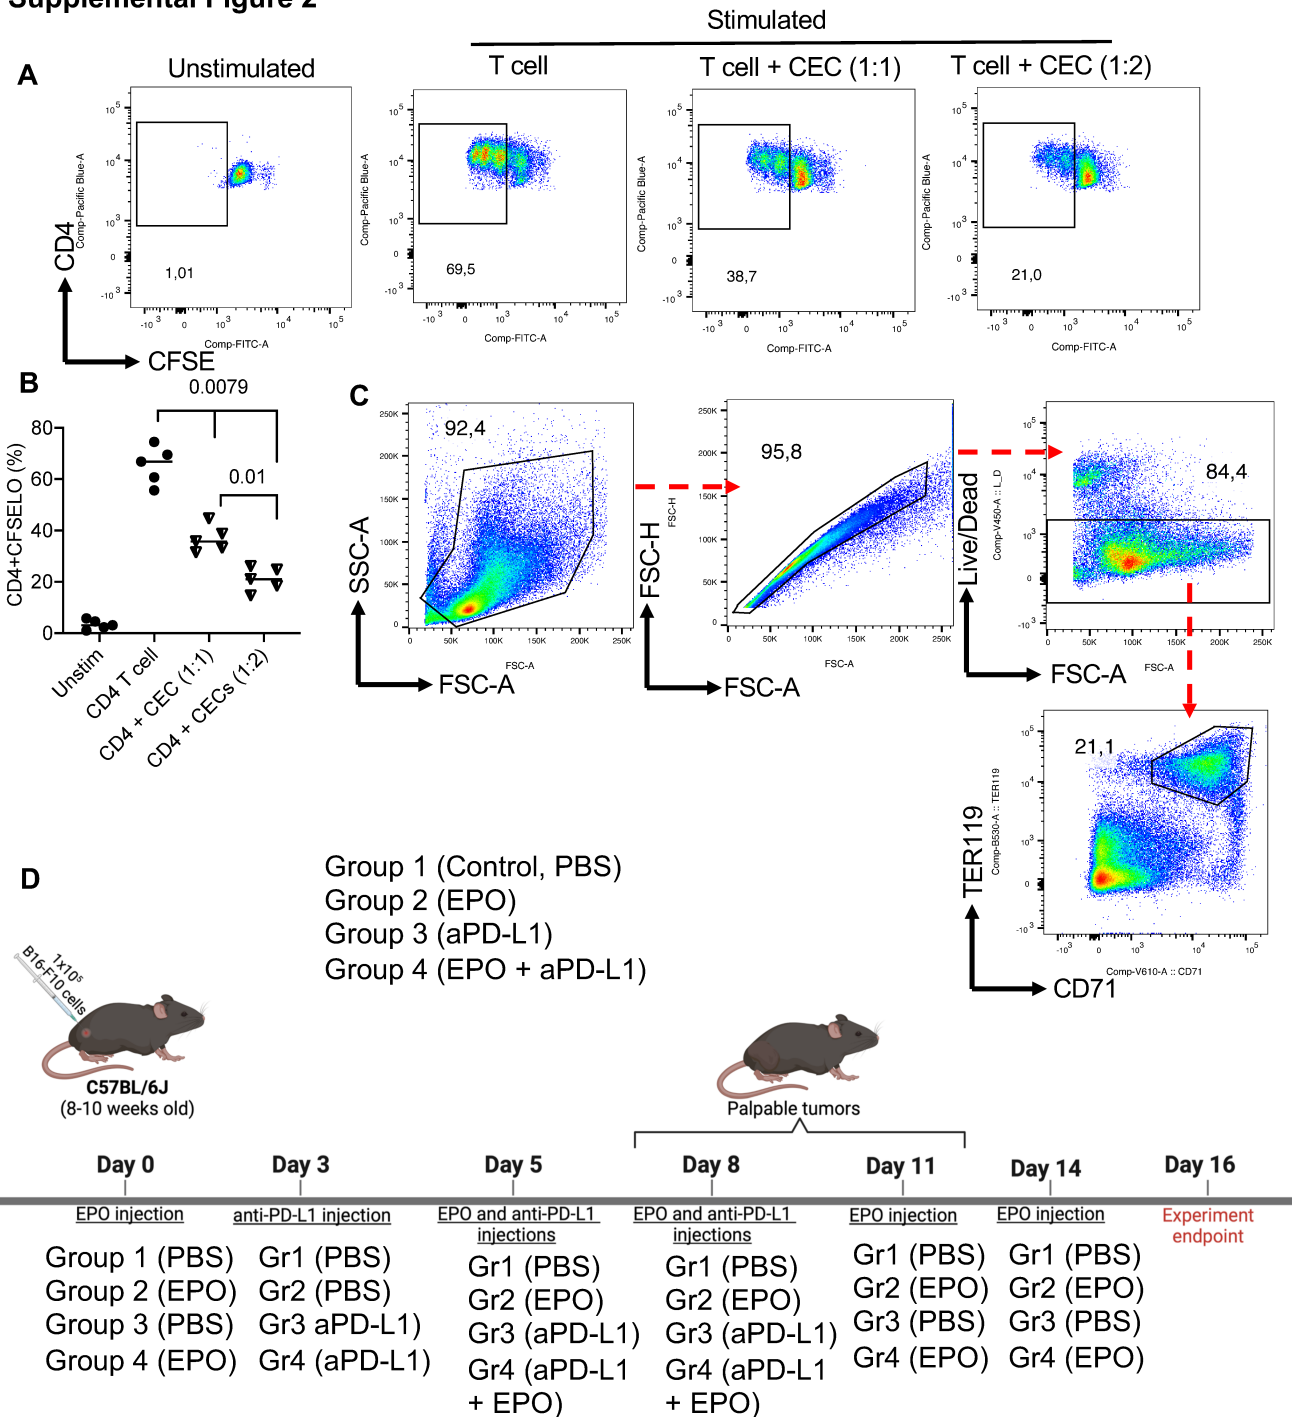

## Supplemental Figure 3

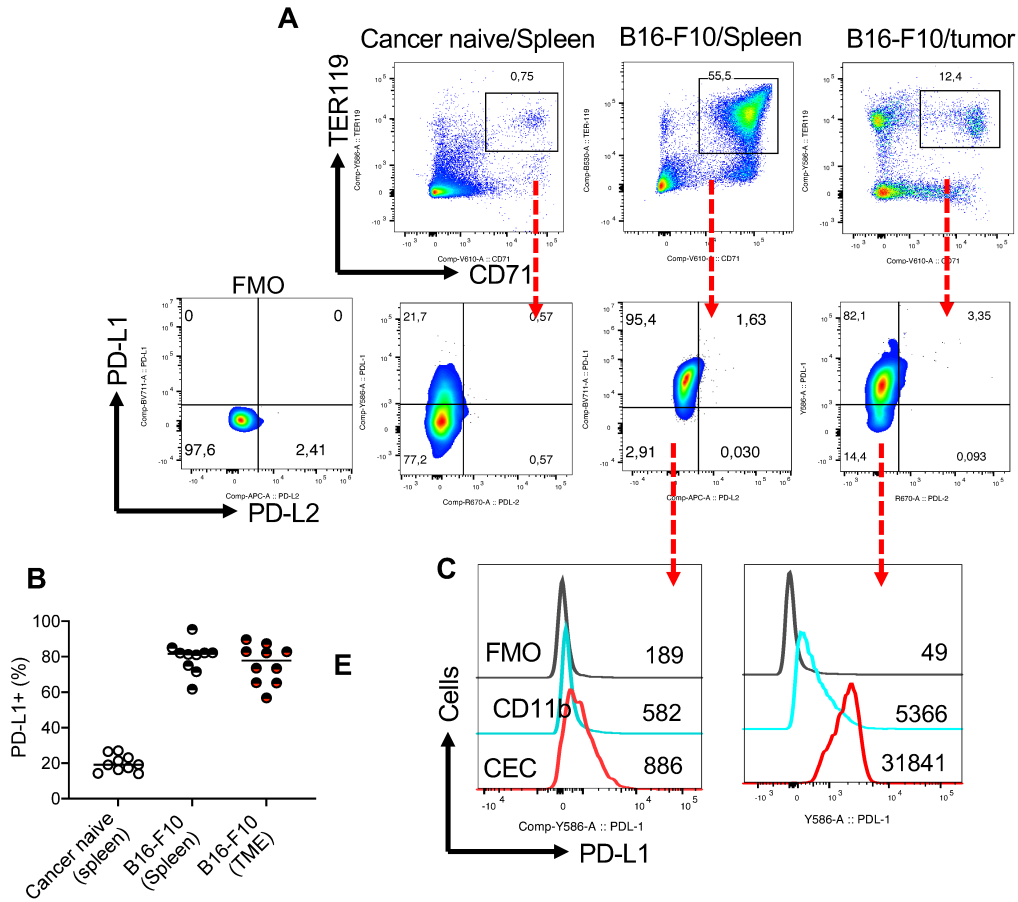

Supplement: jitc-2022-006595supp002.pdf [file jitc-2022-006595supp002.pdf]
